# Supplementary material for: Impact of Perceived Stress and Immune Status on Decision-Making Abilities during COVID-19 Pandemic Lockdown
Source: MDPI journal article supplement (doi:10.3390/bs11120167), 2021-12-02
Supplement: s1 [file s1]

Supplementary materials

**Figure S1.** An example of two trials of the Iowa Gambling Task (IGT). The starting bank amount was always displayed in the upper corner of the screen and trial-by-trial updated. Buttons A and B were associated with winnings of EUR 100 or penalties of EUR 250, whereas buttons C and D were associated with winnings of EUR 50 or penalties of EUR 50.

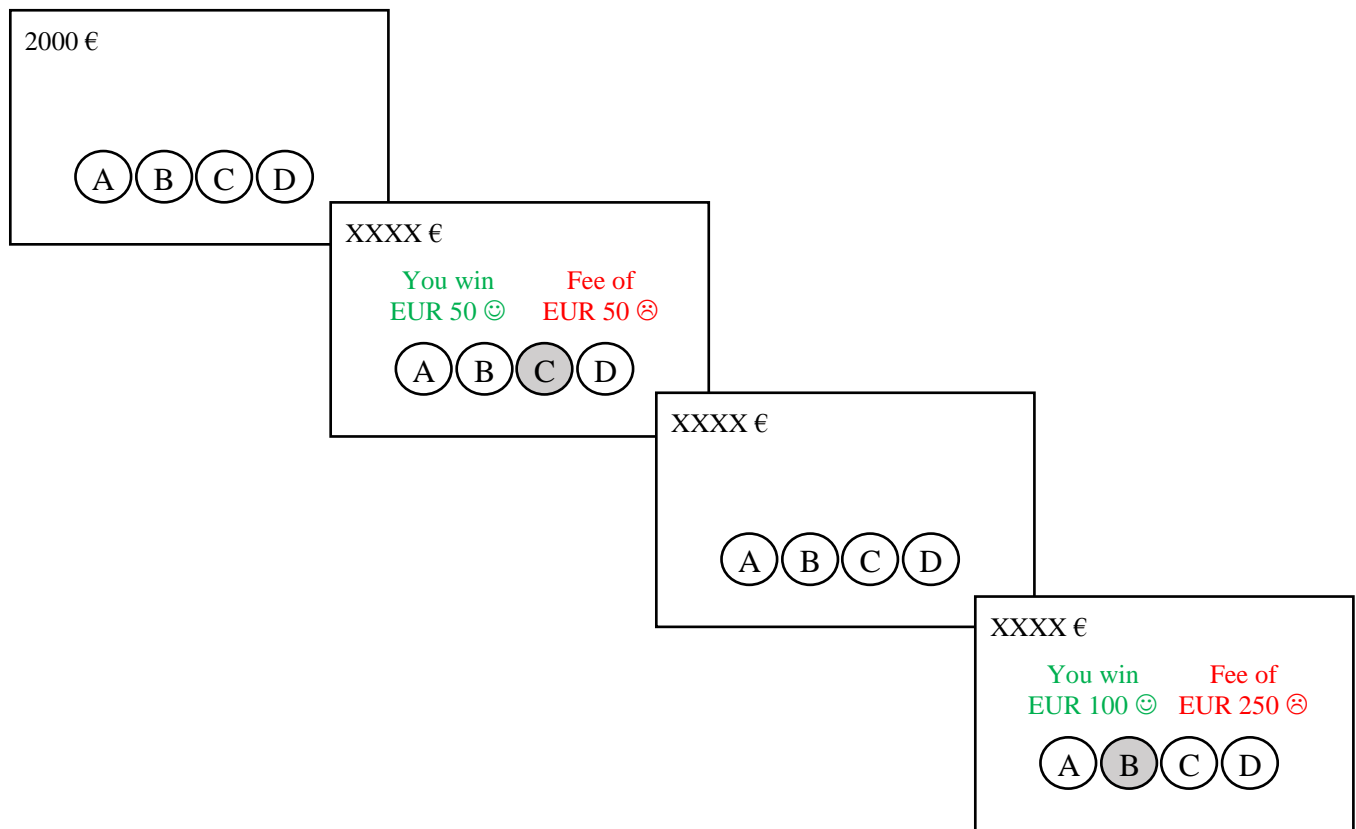

**Figure S2.** An example of four trials of the Go/No-go task (GNG). The blue square was the Go signal, whereas the red square was the No-go signal. The square size (80, 100 or 120 pixel) was counterbalanced across the Go and No-Go conditions. Each trial lasted 1000 ms.

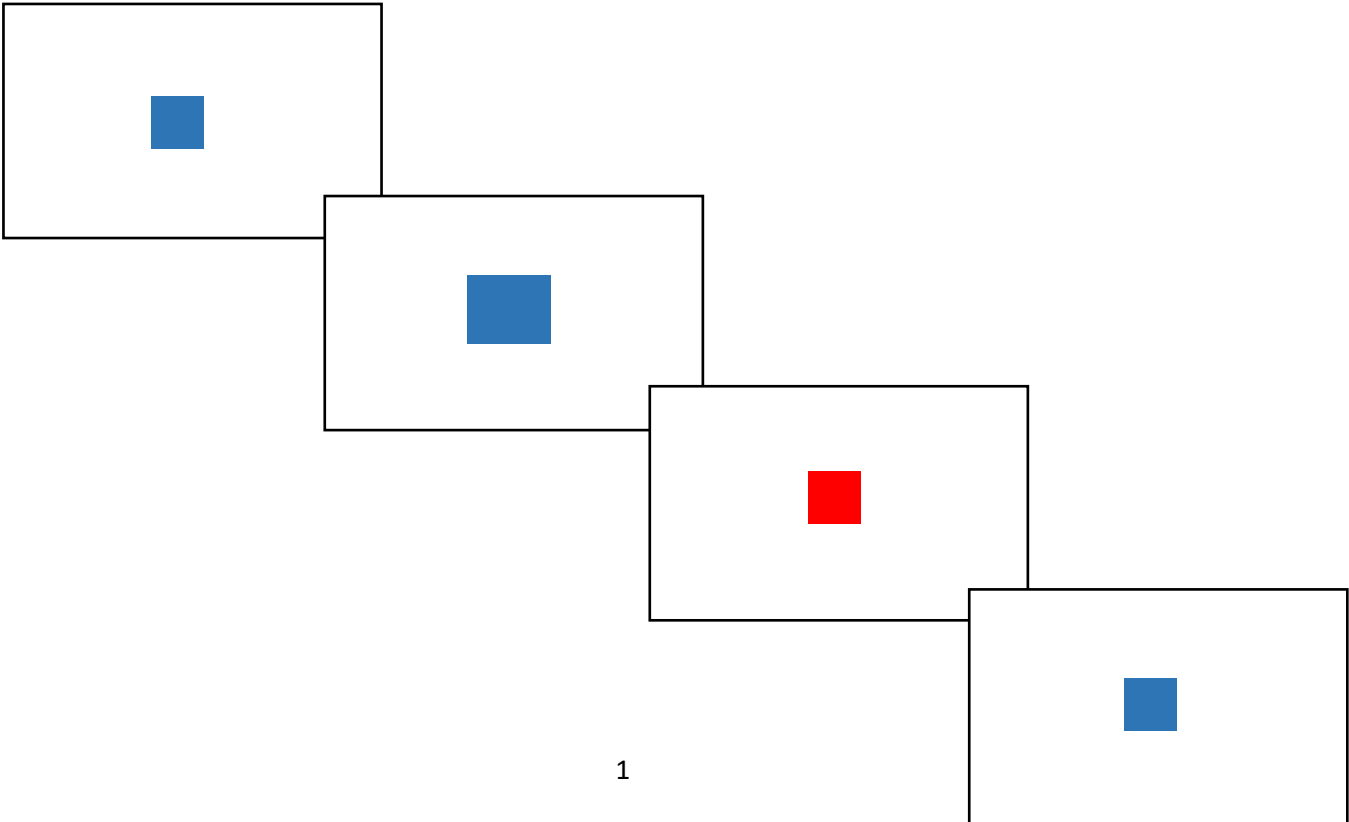

**Figure S3.** Distribution of age in the study sample, grouped by sex. The blue line represents mean age; the dashed red line represents 1 SD below mean; the dashed green line represents 1 SD above the mean.

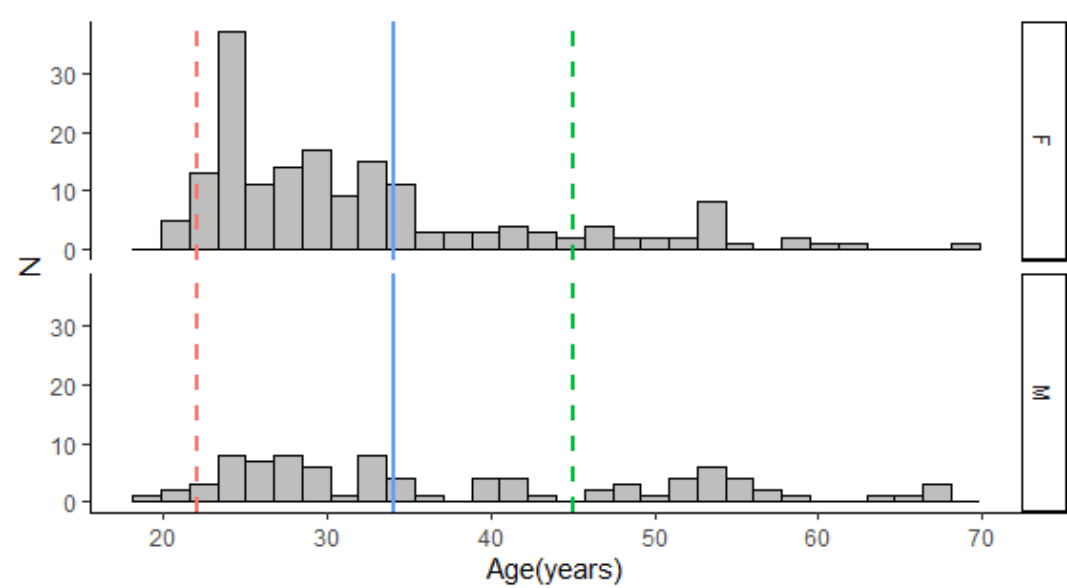

**Figure S4.** Proportion of advantageous choices (C or D vs. A or B buttons) as predicted by the model in Table S7.

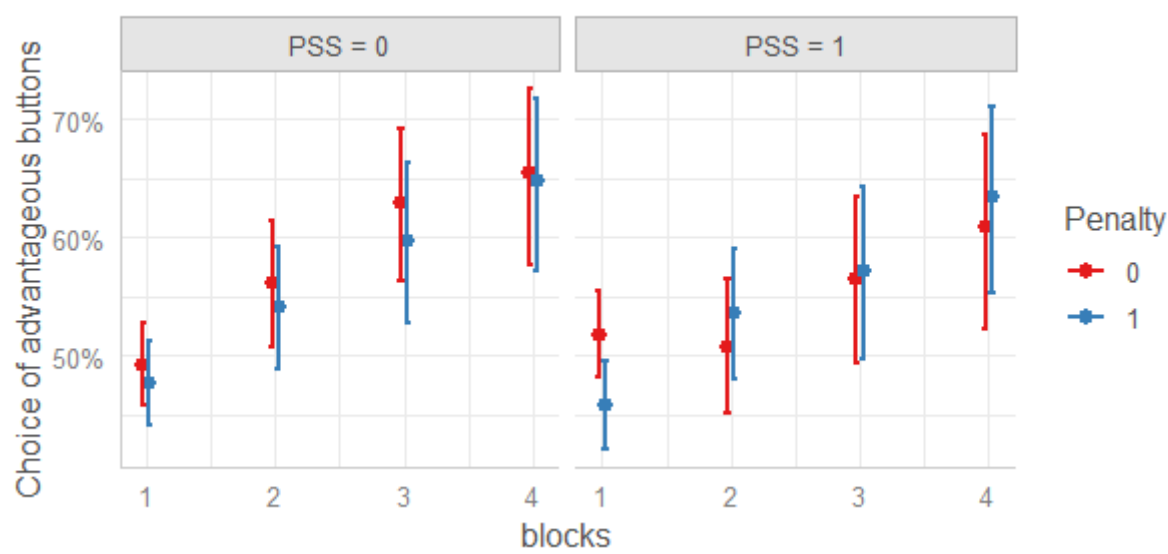

**Table S1.** Demographics of participants who completed the Perceived Stress Scale (PSS), the Depression, Anxiety and Stress Scales (DASS), and the Immune Status Questionnaire (ISQ).

|                       | PSS         | DASS        | ISQ         |
|-----------------------|-------------|-------------|-------------|
| N                     | 260         | 251         | 250         |
| Mean age (SD), years  | 34.3 (11.6) | 33.9 (11.2) | 33.9 (11.2) |
| Female                | 66.9 %      | 66.9 %      | 66.8 %      |
| Education (SD), level | 4.2 (1.1)   | 4.3 (1.1)   | 4.3 (1.1)   |
| Chronic disease       | 23.7 %      | 24.6 %      | 24.7 %      |

**Table S2.** Pearson's correlation coefficients between questionnaires scores. PSS = Perceived Stress Scale, DASS = Depression, Anxiety and Stress Scales, ISQ = Immune Status Questionnaire.\*\*\* $p < 0.001$

|                 | PSS     | DASS depression | DASS anxiety | DASS stress | ISQ |
|-----------------|---------|-----------------|--------------|-------------|-----|
| PSS             | 1       |                 |              |             |     |
| DASS depression | .702*** | 1               |              |             |     |
| DASS anxiety    | .573*** | .643***         | 1            |             |     |
| DASS stress     | .757*** | .72 ***         | .622***      | 1           |     |
| ISQ             | .323*** | .317***         | .369***      | .346***     | 1   |

**Table S3.** Results of the multiple linear regression models that significantly fitted the Iowa score in the first 50 trials (IGT). Estimates = beta coefficients; CI = confidence interval; Sex: 1 = female, 2 = male; PSS = Perceived Stress Scale; ISQ = Immune Status Questionnaire.

| Predictors                         | Estimates | CI             | <i>t</i> | <i>p</i>     |
|------------------------------------|-----------|----------------|----------|--------------|
| Model: IGT ~ Age × Sex × PSS       |           |                |          |              |
| (Intercept)                        | -1.16     | -3.73 – 1.42   | -0.89    | 0.376        |
| Age                                | -0.66     | -3.53 – 2.21   | -0.45    | 0.651        |
| Sex                                | 5.07      | 0.42 – 9.73    | 2.15     | <b>0.033</b> |
| PSS                                | 1.55      | -1.05 – 4.15   | 1.17     | 0.242        |
| Age × Sex                          | -4.08     | -8.72 – 0.56   | -1.73    | 0.084        |
| Age × PSS                          | 0.71      | -2.14 – 3.56   | 0.49     | 0.625        |
| Sex × PSS                          | -1.60     | -6.47 – 3.26   | -0.65    | 0.516        |
| Age × Sex × PSS                    | -4.79     | -9.24 – -0.34  | -2.12    | <b>0.035</b> |
| Model: IGT ~ Age × Sex × ISQ       |           |                |          |              |
| (Intercept)                        | -0.90     | -3.51 – 1.71   | -0.68    | 0.496        |
| Age                                | -0.10     | -3.06 – 2.86   | -0.07    | 0.947        |
| Sex                                | 5.66      | 1.06 – 10.26   | 2.43     | <b>0.016</b> |
| PSS                                | -0.54     | -3.30 – 2.23   | -0.38    | 0.703        |
| Age × Sex                          | -4.46     | -9.37 – 0.45   | -1.79    | 0.075        |
| Age × ISQ                          | -0.65     | -4.14 – 2.84   | -0.37    | 0.715        |
| Sex × ISQ                          | 3.25      | -2.02 – 8.52   | 1.22     | 0.225        |
| Age × Sex × ISQ                    | -6.43     | -11.93 – -0.92 | -2.3     | <b>0.022</b> |
| Model: IGT ~ Age × Sex × PSS × ISQ |           |                |          |              |
| (Intercept)                        | -1.39     | -4.05 – 1.28   | -1.02    | 0.308        |
| Age                                | -0.25     | -3.20 – 2.71   | -0.16    | 0.870        |

|                 |       |                |       |              |
|-----------------|-------|----------------|-------|--------------|
| Sex             | 5.84  | 1.20 – 10.48   | 2.47  | <b>0.014</b> |
| PSS             | 1.89  | -0.42 – 4.21   | 1.6   | 0.111        |
| ISQ             | -1.11 | -3.97 – 1.75   | -0.76 | 0.447        |
| Age × Sex       | -5.2  | -10.26 – -0.15 | -2.02 | <b>0.045</b> |
| Age × PSS       | 0.34  | -2.14 – 2.83   | 0.27  | 0.786        |
| Age × ISQ       | -1.07 | -4.60 – 2.46   | -0.59 | 0.552        |
| Sex × ISQ       | 3.27  | -2.11 – 8.65   | 1.19  | 0.235        |
| PSS × ISQ       | 1.25  | -1.00 – 3.51   | 1.09  | 0.277        |
| Age × Sex × ISQ | -5.65 | -11.27 – -0.04 | -1.97 | <b>0.049</b> |
| Age × PSS × ISQ | 2.21  | -0.29 – 4.71   | 1.74  | 0.084        |

**Table S4.** Comparison among models fitting the score in the first 50 trials (function *compareLM* of the *rcompanion* R package, Mangiafico, 2015). AIC = Akaike information criterion; BIC = Bayes information criterion; Adj R<sup>2</sup> = Adjusted R<sup>2</sup>.

| Model                 | AIC  | AICc | BIC  | R <sup>2</sup> | Adj R <sup>2</sup> | F    | df     | p     |
|-----------------------|------|------|------|----------------|--------------------|------|--------|-------|
| Age × Sex × PSS       | 2210 | 2211 | 2242 | 0.055          | 0.029              | 2.11 | 7,252  | 0.042 |
| Age × Sex × ISQ       | 2106 | 2107 | 2138 | 0.066          | 0.04               | 2.47 | 7,242  | 0.018 |
| Age × Sex × PSS × ISQ | 2109 | 2110 | 2155 | 0.087          | 0.045              | 2.07 | 11,238 | 0.023 |

**Table S5.** Results of the multiple linear regression model that significantly fitted the sensitivity index ( $d'$ ) of the Go/No-go task. Estimates = beta coefficients; CI = confidence interval; Sex: 1 = female, 2 = male; DASS = Depression, Anxiety and Stress Scales.

| Predictors                                | Estimates   | CI            | t     | p                |
|-------------------------------------------|-------------|---------------|-------|------------------|
| Model: $d' \sim$ Age × Sex × DASS anxiety |             |               |       |                  |
| (Intercept)                               | 3.70        | 3.60 – 3.79   | 78.64 | <b>&lt;0.001</b> |
| Age                                       | 0.00        | -0.10 – 0.10  | 0.02  | 0.985            |
| Sex                                       | 0.03        | -0.14 – 0.19  | 0.32  | 0.746            |
| DASS anxiety                              | -0.14       | -0.22 – -0.05 | -3.12 | <b>0.002</b>     |
| Age × Sex                                 | -0.08       | -0.26 – 0.11  | -0.82 | 0.415            |
| Age × DASS anxiety                        | 0.06        | -0.04 – 0.15  | 1.22  | 0.223            |
| Sex × DASS anxiety                        | 0.10        | -0.09 – 0.29  | 1.03  | 0.303            |
| Age × Sex × DASS anxiety                  | -0.10       | -0.32 – 0.13  | -0.84 | 0.404            |
| R <sup>2</sup> / Adjusted R <sup>2</sup>  | 0.058/0.031 |               |       |                  |
| F                                         | 2.15        |               |       |                  |
| df                                        | 7, 244      |               |       |                  |
| p                                         | 0.039       |               |       |                  |

**Table S6.** Results of the multiple linear regression model that significantly fitted the  $c$  criterion values of the Go/No-go task. Estimates = beta coefficients; CI = confidence interval; Sex: 1 = female, 2 = male.

| Predictors                | Estimates | CI            | t      | p                |
|---------------------------|-----------|---------------|--------|------------------|
| Model: $c \sim$ Age × Sex |           |               |        |                  |
| (Intercept)               | -0.38     | -0.42 – -0.34 | -17.38 | <b>&lt;0.001</b> |
| Age                       | 0.07      | 0.02 – 0.12   | 2.96   | <b>0.003</b>     |
| Sex                       | 0.02      | -0.06 – 0.09  | 0.48   | 0.632            |

|                                          |             |              |       |       |
|------------------------------------------|-------------|--------------|-------|-------|
| Age × Sex                                | -0.03       | -0.10 – 0.04 | -0.88 | 0.379 |
| R <sup>2</sup> / Adjusted R <sup>2</sup> | 0.046/0.034 |              |       |       |
| <i>F</i>                                 | 4.07        |              |       |       |
| df                                       | 3,256       |              |       |       |
| <i>p</i>                                 | 0.007       |              |       |       |

**Table S7.** Results of the multiple linear regression model that fitted the proportion of choices of button C and D (level 1) relative to A and B (level 0). Trial-by-trial responses were entered. Dichotomous predictors were included in the model, expect block. The interaction between the number of the block (from 1 to 4), the presence (level 1) or absence (level 0) of a fee to pay (penalty), and a high ( $> 17$ , level 1) or low ( $\leq 17$ , level 0) PSS score was assessed. The presence (level 1) or absence (level 0) of a penalty in the preceding trial was entered as covariate. Random intercepts and slopes for block number (block), correlated by participant (subj), were considered. PSS = Perceived Stress Scale; CI = confidence interval.

| Model                                                                                           | Odds Ratios   | CI          | <i>z</i> | <i>p</i>         |
|-------------------------------------------------------------------------------------------------|---------------|-------------|----------|------------------|
| Proportion of advantageous choices ~ block × penalty × PSS + preceding penalty + (block   subj) |               |             |          |                  |
| (Intercept)                                                                                     | 0.97          | 0.84 – 1.11 | -0.432   | 0.666            |
| Block 2                                                                                         | 1.32          | 1.10 – 1.58 | 2.994    | <b>0.003</b>     |
| Block 3                                                                                         | 1.75          | 1.37 – 2.24 | 4.445    | <b>&lt;0.001</b> |
| Block 4                                                                                         | 1.96          | 1.44 – 2.66 | 4.270    | <b>&lt;0.001</b> |
| Penalty                                                                                         | 0.94          | 0.81 – 1.08 | -0.876   | 0.381            |
| PSS                                                                                             | 1.11          | 0.91 – 1.35 | 1.021    | 0.307            |
| Preceding penalty                                                                               | 1.03          | 0.98 – 1.09 | 1.178    | 0.239            |
| Block 2 × penalty                                                                               | 0.98          | 0.80 – 1.20 | -0.187   | 0.852            |
| Block 3 × penalty                                                                               | 0.93          | 0.75 – 1.15 | -0.652   | 0.514            |
| Block 4 × penalty                                                                               | 1.03          | 0.83 – 1.28 | 0.297    | 0.767            |
| Block 2 × PSS                                                                                   | 0.73          | 0.56 – 0.95 | -2.371   | <b>0.018</b>     |
| Block 3 × PSS                                                                                   | 0.69          | 0.48 – 0.99 | -2.037   | <b>0.042</b>     |
| Block 4 × PSS                                                                                   | 0.74          | 0.47 – 1.15 | -1.344   | 0.179            |
| Penalty × PSS                                                                                   | 0.84          | 0.68 – 1.03 | -1.707   | 0.088            |
| Block 2 × penalty × PSS                                                                         | 1.45          | 1.08 – 1.95 | 2.458    | <b>0.014</b>     |
| Block 3 × penalty × PSS                                                                         | 1.40          | 1.04 – 1.91 | 2.185    | <b>0.029</b>     |
| Block 4 × penalty × PSS                                                                         | 1.38          | 1.02 – 1.89 | 2.059    | <b>0.039</b>     |
| Marginal R <sup>2</sup> / Conditional R <sup>2</sup>                                            | 0.012 / 0.357 |             |          |                  |

Mangiafico, S.S. 2015. An R Companion for the Handbook of Biological Statistics.  
<https://rcompanion.org/rcompanion/>
